# Causes and consequences of linkage disequilibrium among transposable elements within eukaryotic genomes

Denis Roze<sup>\*,†</sup>

\* CNRS, IRL 3614 Evolutionary Biology and Ecology of Algae, 29688 Roscoff,  
France

† Sorbonne Université, Station Biologique de Roscoff, 29688 Roscoff, France

*Running title:* LD among transposable elements

*Keywords:* epistasis, genetic drift, genetic interference, multilocus model, recombination

*Address for correspondence:*

Denis Roze  
Station Biologique de Roscoff  
Place Georges Teissier, CS90074  
29688 Roscoff Cedex  
France  
Phone: (+33) 2 56 45 21 39  
Fax: (+33) 2 98 29 23 24  
email: roze@sb-roscoff.fr

## ABSTRACT

Sex and recombination can affect the dynamics of transposable elements (TEs) in various ways: while sex is expected to help TEs to spread within populations, the deleterious effect of ectopic recombination among transposons represents a possible source of synergistic purifying selection limiting their number. Furthermore, recombination may also increase the efficiency of selection against TEs by reducing selective interference among loci. In order to better understand the effects of recombination and reproductive systems on TE dynamics, this article provides analytical expressions for the linkage disequilibrium (LD) among TEs in a classical model in which TE number is stabilized by synergistic purifying selection. The results show that positive LD is predicted in infinite populations despite negative epistasis, due to the effect of the transposition process. Positive LD may substantially inflate the variance in the number of elements per genome in the case of partially selfing or partially clonal populations. Finite population size tends to generate negative LD (Hill-Robertson effect), the relative importance of this effect increasing with the degree of linkage among loci. The model is then extended in order to explore how TEs may affect selection for recombination. While positive LD generated by transposition generally disfavors recombination, the Hill-Robertson effect may represent a non-negligible source of indirect selection for recombination when TEs are abundant. However, the direct fitness cost imposed by ectopic recombination among elements generally drives the population towards low-recombination regimes, at which TEs cannot be maintained at a stable equilibrium.

## INTRODUCTION

Transposable elements (TEs) constitute an important fraction of the genetic material of many eukaryotes (Wells and Feschotte, 2020). Due to their capacity of self-replication, these genetic elements can indeed proliferate within genomes without bringing any net benefit to their host, earning them the qualification of “selfish DNA” (Doolittle and Sapienza, 1980; Orgel and Crick, 1980). While the number of copies of transposable elements per genome can reach very large values (for example, millions of copies of the *Alu* short interspersed element are present in the human genome, e.g., Cordaux and Batzer, 2009), their propagation is thought to be limited by two main factors: purifying selection acting against TE insertions, and the evolution of mechanisms restricting TE activity, which have been increasingly well described over recent years (Goodier, 2016; Kelleher et al., 2020; Almeida et al., 2022). Natural selection against TEs may take several forms. First, TE insertions may be deleterious when they occur within coding or regulatory sequences: a number of human diseases are indeed due to such insertions impairing gene function (Hancks and Kazazian, 2016; Payer and Burns, 2019). A second potential source of selection against TEs stems from fitness costs resulting from their activity (Nuzhdin, 1999). Third, the presence of similar sequences at different genomic locations may cause ectopic recombination events that will often lead to strongly deleterious genomic rearrangements (Montgomery et al., 1987; Langley et al., 1988; Hedges and Deininger, 2007). Ectopic recombination among TE insertions has indeed been observed in *Drosophila melanogaster* (Montgomery et al., 1991) and is also a cause of human genetic disease (Payer and Burns, 2019). Although the role of ectopic recombination in the containment of TEs has led to some debate (e.g., Biémont et al., 1997; Charlesworth et al., 1997), several lines of evidence suggest that it may be an important factor: in particular, the frequency of individual TE insertions correlates negatively with their length (longer insertions are expected to be more prone to ectopic exchange) and with the number of elements from the same family present in the genome, in both *D. melanogaster* and humans (Song and Boissinot, 2007; Petrov et al., 2011). Furthermore, TEs tend to accumulate in genomic regions with reduced recombination (e.g., Table 1 of Kent et al., 2017), which is often interpreted as a consequence of lower rates of ectopic recombination in these

regions.

Additional factors may generate a negative correlation between recombination  
 55 rate and TE density, however (Kent et al., 2017). Gene density is often lower in ge-  
 nomic regions with reduced recombination, and the risk that a transposable element  
 inserts into a coding sequence may thus be less important in these regions. Accord-  
 ingly, TE density correlates more with gene density than with local recombination rate  
 in the self-fertilizing species *Caenorhabditis elegans* and *Arabidopsis thaliana* (Duret  
 60 et al., 2000; Wright et al., 2003), possibly due to the fact that ectopic recombination is  
 less frequent in selfing than in outcrossing species, as it seems to occur mostly between  
 heterozygous insertions (Montgomery et al., 1991). Furthermore, reduced recombi-  
 nation may evolve as a side effect of DNA methylation and chromatin modifications  
 involved in the silencing of TEs, raising the possibility that local decreases in recom-  
 65 bination rates may result from higher TE densities (Kent et al., 2017). Last, selection  
 is less efficient in low recombination regions due to the Hill-Robertson effect (Hill and  
 Robertson, 1966), which may cause an accumulation of TEs in these regions if TE  
 insertions tend to be deleterious on average. This last hypothesis was explored by  
 Dolgin and Charlesworth (2008) using a simulation model, showing that substantial  
 70 increases in TE density are predicted only when recombination is very low.

It is interesting to note that contrasting views on the effect of recombination  
 (or genetic exchange in general) on the dynamics of TEs can be found in the liter-  
 ature. On one hand, sexual reproduction is predicted to favor the spread of TEs,  
 since in an asexual population (and in the absence of horizontal transfer) TEs stay  
 75 confined into the lineage in which they first appeared (Hickey, 1982; Zeyl and Bell,  
 1996; Zeyl et al., 1996). In this scenario, sex and recombination tend to decrease the  
 efficiency of selection against TEs by reducing the variance in the number of TEs per  
 individual. On the other hand, the absence of recombination may lead to TE accumu-  
 lation through Muller’s ratchet (Muller, 1964; Arkhipova and Meselson, 2005a; Dolgin  
 80 and Charlesworth, 2008): here, recombination tends to increase the variance in TE  
 number (and in fitness) among individuals, by breaking negative linkage disequilibria  
 (LD) among TEs. In agreement with this dual role of sex and recombination, Dolgin  
 and Charlesworth (2006) showed that a transition from a sexual to an asexual mode  
 of reproduction may either lead to the proliferation of TEs or to their elimination,

depending on parameter values (population size in particular). However, a more detailed understanding of the possible effects of recombination of TE dynamics requires the development of analytical models assessing the relative importance of the different possible sources of LD among TEs.

A related, but somewhat less explored question concerns the effect of TEs on the evolution of recombination. Although the fitness cost generated by ectopic recombination among TEs should select for lower recombination rates (Kent et al., 2017; Brand et al., 2018), polymorphic TE insertions may also indirectly favor recombination. In particular, Charlesworth and Barton (1996) argued that non-zero rates of recombination may be favored in the presence of TEs, for two different reasons. First, ectopic recombination generates negative epistasis (on fitness) among TE copies (since fitness should decline faster than linearly with the number of copies present in the genome), and classical models predict that negative epistasis among deleterious mutations should favor the maintenance of non-zero recombination rates (Charlesworth, 1990; Barton, 1995). Second, increasing the rate of ectopic recombination leads to stronger selection against TEs, so that a modifier increasing recombination should eventually benefit from a lower load of TEs. However, the arguments of Charlesworth and Barton (1996) were mostly verbal, and a quantitative analysis of the relative importance of these different effects is still lacking. Additionally, the Hill-Robertson effect has been shown to be a potentially important source of selection for recombination in finite populations (Barton and Otto, 2005; Keightley and Otto, 2006; Roze, 2021), and the possible contribution of TEs to this process remains to be quantified.

This article presents approximations for the linkage disequilibrium between pairs of polymorphic TE insertions, in a classical model in which TEs are maintained at a stable equilibrium between transposition and epistatic selection (Charlesworth and Charlesworth, 1983; Langley et al., 1988; Charlesworth, 1991). The results show that, while negative epistasis tends to generate negative LD among elements, transposition generates positive LD. At equilibrium and in very large populations, the effect of transposition predominates, generating an excess variance in the number of TE copies per individual due to positive associations among TEs. This excess variance is substantial only for very low recombination rates, but may be important in the case of partially clonal or partially selfing populations with low rates of sex or outcross-

ing. In finite populations, the Hill-Robertson effect tends to generate negative LD among TE insertions, and this effect may be stronger than the deterministic effects of transposition and epistasis in regimes where drift is important, particularly among tightly linked loci. While the Hill-Robertson effect among TEs tends to favor recombination, the direct fitness cost of ectopic recombination generally predominates at high recombination rates, while TEs are often not maintained at a stable equilibrium when recombination is too low.

## METHODS

**Model of TE dynamics.** The basic model of transposon dynamics considered here is similar to the one used in Charlesworth (1991) and Dolgin and Charlesworth (2006, 2008), representing a diploid population of constant size  $N$  with discrete generations (the notation used in the paper is summarized in Table 1). Individuals carry two copies of a linear chromosome, along which TEs may insert at random: each element generates a new copy with probability  $u$  per generation, the new copy inserting at a random location (drawn from a uniform distribution along the chromosome) either on the same or on the homologous chromosome. TEs may also be eliminated by excision, occurring at a rate  $v$  per element per generation. The fitness  $W$  of an individual is a decreasing function of the number of TEs in its genome ( $n$ ), given by:

$$W = \exp(-\alpha n - \beta n_p) \quad (1)$$

where  $\alpha$  is the direct fitness effect of a transposon insertion, while the term in  $\beta$  corresponds to pairwise negative epistasis among TEs (that may stem from the deleterious effect of ectopic recombination among elements),  $n_p$  being the number of pairs of TEs present at different sites in the genome. When  $n$  is large, and when each insertion at any given site stays rare in the population (and is thus mostly present in the heterozygous state), then  $n_p \approx n^2/2$  and equation 1 becomes equivalent to equation 1 in Dolgin and Charlesworth (2008). Note that equation 1 does not take into account the fact that ectopic recombination may occur more frequently among heterozygous than among homozygous insertions (Montgomery et al., 1991). Introducing this feature into the model should not significantly affect the results when mating is random and

145 insertions stay at low frequency, but would decrease the effect of selection against TEs under partial selfing, resulting in higher TE loads (Wright and Schoen, 1999; Morgan, 2001). The different events of the life cycle occur in the following order: excision – transposition – selection – reproduction (involving recombination and fertilization). During recombination, the number of crossovers occurring at meiosis is drawn from a  
150 Poisson distribution with parameter  $R$  (chromosome map length, in Morgans), the position of each crossover being drawn from a uniform distribution along the chromosome (no interference). Different reproductive systems will be considered: outcrossing with random mating, facultative sex (a proportion  $\sigma$  of offspring being produced by random mating, while a proportion  $1 - \sigma$  is produced clonally), and partial self-fertilization (a  
155 proportion  $s$  of offspring being produced by selfing).

A modified model in which  $f$  different TE families are present in the population will also be considered. In this case, the rates of transposition and excision ( $u$  and  $v$ ) are supposed to be identical for all families, while epistatic interactions (or ectopic recombination) only occur between elements from the same family, so that the fitness  
160 of an individual is given by:

$$W = \exp \left( -\alpha \sum_{y=1}^f n_y - \beta \sum_{y=1}^f n_{p,y} \right) \quad (2)$$

where  $n_y$  is the number of TEs from family  $y$  in the genome of the individual, and  $n_{p,y}$  the number of pairs of TEs from family  $y$  present at different sites.

**Genetic associations and variance decomposition.** Denoting  $p_i$  the frequency of  
165 elements present at insertion site  $i$  in the population, the average number of elements per individual is given by  $\bar{n} = 2 \sum_i p_i$ . Furthermore, defining  $X_{i,\emptyset}$  and  $X_{\emptyset,i}$  as indicator variables that equal 1 if an element is present at insertion site  $i$  on the first or second haplotype of an individual, and 0 otherwise, pairwise genetic associations can be defined as:

$$\begin{aligned} D_{i,i} &= \mathbb{E} [(X_{i,\emptyset} - p_i) (X_{\emptyset,i} - p_i)] \\ D_{ij} &= \mathbb{E} [(X_{i,\emptyset} - p_i) (X_{j,\emptyset} - p_j)] = \mathbb{E} [(X_{\emptyset,i} - p_i) (X_{\emptyset,j} - p_j)] \\ D_{i,j} &= \mathbb{E} [(X_{i,\emptyset} - p_i) (X_{\emptyset,j} - p_j)] = \mathbb{E} [(X_{\emptyset,i} - p_i) (X_{j,\emptyset} - p_j)] \end{aligned} \quad (3)$$



where  $E$  stands for the average over all individuals in the population (the last equalities of the last two lines of equation 3 stem from the fact that model assumes no difference between sexes). The association  $D_{i,i}$  measures excess homozygosity at site  $i$  ( $D_{i,i} = 0$  at Hardy-Weinberg equilibrium), while  $D_{ij}$  corresponds to the classical linkage disequilibrium between sites  $i$  and  $j$  (on the same haplotype), and  $D_{i,j}$  to the association between insertions at sites  $i$  and  $j$  present on different haplotypes. Using these variables, the variance in the number of elements per individual can be decomposed as:

$$\text{Var}(n) = 2 \sum_i (p_i q_i + D_{i,i}) + 2 \sum_{i \neq j} (D_{ij} + D_{i,j}) \quad (4)$$

where the first sum is over all insertion sites, the second over all pairs of insertions sites, and where  $q_i = 1 - p_i$ . Assuming that the frequency of insertions is low at each site (so that  $p_i q_i \approx p_i$ ), and using the fact that  $D_{i,i} = 0$ ,  $D_{i,j} = 0$  under random mating, equation 4 simplifies to:

$$\text{Var}(n) \approx \bar{n} + 2 \sum_{i \neq j} D_{ij}. \quad (5)$$

When linkage disequilibria (LD) are negligible, the number of TEs per genome is approximately Poisson distributed, with a variance equal to the mean (Charlesworth and Charlesworth, 1983). Positive LD tend to increase the variance in TE number, and negative LD to decrease the variance. The overall effect of LD on the variance can thus be measured as:

$$\rho = \frac{\text{Var}(n)}{2 \sum_i (p_i q_i + D_{i,i})} \approx \frac{\text{Var}(n)}{\bar{n}} \quad (6)$$

that equals 1 when the effect of LD is negligible. Under partial selfing,  $D_{i,i} = F p_i q_i$  where  $F$  is the inbreeding coefficient (close to  $s / (2 - s)$  when selection is weak at each site) while associations  $D_{i,j}$  may differ from zero. In that case, the effect of genetic associations between loci on the variance in TE number is given by:

$$\rho \approx \frac{\text{Var}(n)}{\bar{n} (1 + F)}. \quad (7)$$

The same expression can be used under partial clonality, except that  $F$  equals zero in this case (at least when population size is sufficiently large, so that drift can be

ignored). In the Supplementary Methods, approximations for  $\rho$  are derived under the different life cycles considered, assuming that the parameters  $u$ ,  $v$ ,  $\alpha$  and  $\beta$  are small (of order  $\epsilon$ ).

**Simulation programs.** Individual based simulations are used to check the validity of analytical approximations. The simulation program (written in C++ and available from Zenodo) represents a population of  $N$  diploids, each carrying two copies of a linear chromosome (represented as an array of real numbers between 0 and 1, corresponding to the positions of TEs present on the chromosome). At the start of the simulation, the number of TEs in each individual is drawn from a Poisson distribution with parameter  $n_{\text{init}}$  (generally set to 10), their positions along the chromosome being drawn from a uniform distribution. The different events of the life cycle occur as in the analytical model. Three different outcomes are possible depending on parameter values: (i) TEs are eliminated from the population, (ii) the number of TEs increases indefinitely (in which case the program must be stopped), (iii) the number of TEs fluctuates around an equilibrium value (equilibrium being reached during the first  $10^5$  generations for the parameter values used in the paper). In the last case, simulations generally run over  $10^6$  generations, the mean and variance in the number of TEs per individual being measured every 100 generations (averages are computed over the last  $9 \times 10^5$  generations). The program also estimates the quantity  $\sum_i p_i^2$  from the mean number of TE insertions shared between two chromosomes (over 1000 pairs of chromosomes randomly sampled from the population), so that the effect of genetic associations between sites on the variance in TE number can be computed as  $\text{Var}(n) / (2 \sum_i p_i q_i) = \text{Var}(n) / (\bar{n} - 2 \sum_i p_i^2)$  under random mating and partial clonality, and  $\text{Var}(n) / [(\bar{n} - 2 \sum_i p_i^2) (1 + F)]$  under partial selfing (however, neglecting the terms in  $\sum_i p_i^2$  often yields similar results). In a different version of the program, pairwise LD are measured over different classes of genetic distance between elements, these LD measures being taken every 1000 generations, from 100 replicate samples of 200 individuals. A third version of the program considers different shapes of fitness function: in this case, fitness is defined as:

$$W = \exp(-\beta n^\gamma) \quad (8)$$

where  $\gamma > 1$  to ensure that TEs can be maintained at a stable equilibrium.

When  $f$  different TE families are segregating in the population and under random mating, the variance in the total number of elements present in an individual can be decomposed as:

$$\begin{aligned} \text{Var}(n_{\text{tot}}) &= \sum_y \text{Var}(n_y) + 2 \sum_{y \neq z, i \neq j} D_{i_y j_z} \\ &= \bar{n}_{\text{tot}} - 2 \sum_{y, i} p_{i_y}^2 + 2 \sum_{y, i \neq j} D_{i_y j_y} + 2 \sum_{y \neq z, i \neq j} D_{i_y j_z} \end{aligned} \quad (9)$$

where  $\bar{n}_{\text{tot}}$  and  $\text{Var}(n_{\text{tot}})$  are the mean and variance in the total number of TEs per individual,  $n_y$  the number of elements from family  $y$ ,  $D_{i_y j_z}$  the linkage disequilibrium between an element from family  $y$  present at site  $i$  and an element from family  $z$  present at site  $j$ , and  $p_{i_y}$  the frequency of elements from family  $y$  at site  $i$ . The program thus measures  $\bar{n}_{\text{tot}}$ ,  $\text{Var}(n_{\text{tot}})$ ,  $\sum_y \text{Var}(n_y)$  and  $\sum_y \sum_i p_{i_y}^2$  (estimated from the mean number of insertions shared between pairs of chromosomes) in order to infer the sum of LD between elements from the same family (second sum in the second line of equation 9), and the sum of LD between elements from different families (third sum in the second line of equation 9).

**Evolution of recombination.** In the case of a randomly mating population, the effect of LD among TEs on selection for recombination is explored by incorporating a modifier locus affecting the genetic map length  $R$  of the chromosome. In the deterministic limit (infinite population), the effect of linkage disequilibria between pairs of elements on indirect selection at the modifier locus can be computed by extending the method of Barton (1995). In the case of a finite population, a general expression for the strength of selection for recombination generated by the Hill-Robertson effect between pairs of deleterious mutations (derived in Roze, 2021) can be transposed to the present model, as explained in the Supplementary Methods. These deterministic and stochastic terms can then be integrated over the chromosome to quantify the overall strength of indirect selection at the modifier locus (neglecting the effect of genetic associations involving more than 2 insertion sites). While ectopic recombination induces a fitness cost associated with recombination (generating a direct selective pressure to reduce  $R$ ), this direct cost depends on the correlation between the rate of meiotic re-

combination and the rate of ectopic recombination. This correlation is controlled by a parameter  $\theta$ , rewriting the epistasis coefficient  $\beta$  in equation 1 (that may be considered as a rate of ectopic recombination) as:

$$\beta = \tilde{\beta}(1 - \theta + \theta R) \quad (10)$$

where  $R$  is the chromosome map length of the individual (that depends on its genotype at the modifier locus). When  $\theta = 0$ , the rate of ectopic recombination is thus independent of  $R$  (no direct cost of recombination), while increasing  $\theta$  increases the magnitude of direct selection against recombination due to the deleterious effect of ectopic exchanges among TEs. Analytical predictions for the evolutionary stable chromosome map length are compared with individual based simulation results. For this, the simulation program is extended to include a modifier locus affecting  $R$ , using a similar setting as in Roze (2021) — see Supplementary Methods for more details.

## RESULTS

**Deterministic model.** In a randomly mating population, neglecting the effect of drift and linkage disequilibria, the average number of elements per individual at equilibrium is given by:

$$\bar{n} \approx \frac{u - v - \alpha}{\beta} \quad (11)$$

(Charlesworth, 1991), showing that negative epistasis ( $\beta > 0$ ) is required in order to maintain the number of TE copies at a stable equilibrium. In the Supplementary Methods, the linkage disequilibrium between segregating elements at insertion sites  $i$  and  $j$  is shown to be approximately:

$$D_{ij} \approx \frac{1}{r_{ij} + 2u} \left[ \frac{u}{2L} (p_i + p_j) - \beta p_i p_j \right] \quad (12)$$

where  $r_{ij}$  is the recombination rate between the two sites, and  $L$  the total number of possible insertion sites (assumed to be much larger than the number of elements present in a genome). Equation 12 shows that two different effects generate linkage disequilibrium among TEs: negative epistasis tends to generate negative LD (term in  $\beta$  in equation 12), while transposition generates positive LD (term in  $u$ ). While the effect of epistasis on LD has been known for long (e.g., Felsenstein, 1965), the

effect of transposition has not been formally described before. This effect stands from the fact that the insertion of a new TE copy into the same chromosome as the parental copy generates positive LD among the two copies. By contrast, when the new copy inserts into the homologous chromosome (say at site  $j$ ), positive LD is generated if the individual carries the insertion at the initial site (say site  $i$ ) in the homozygous state, while negative LD is generated if the individual is heterozygous for the insertion at site  $i$ . Because the individual is homozygous at site  $i$  with probability  $p_i$  (and heterozygous with probability  $1 - p_i$ ), the LD generated by transposition to the homologous chromosome is zero on average (and the net effect of transposition is thus positive, due to insertions into the same chromosome as the parental copy). Summing over all possible pairs of insertion sites and using  $\bar{n} = 2 \sum_i p_i$ , equations 11 and 12 yield:

$$2 \sum_{i \neq j} D_{ij} \approx \mathcal{E}_1 \frac{u + v + \alpha}{2} \bar{n} \quad (13)$$

where  $\mathcal{E}_1$  is the average of  $1/(r_{ij} + 2u)$  over all pairs of sites — an approximation for  $\mathcal{E}_1$  as a function of  $u$  and  $R$  is given in the Supplementary Methods in the case where the density of crossovers is uniform along the chromosome. Equation 13 shows that in the present model, the effect of transposition (generating positive LD) is always stronger than the effect of epistasis (generating negative LD), so that LD is positive at equilibrium despite the fact that epistasis is negative. From equations 6 and 13, the inflation in the variance in number of TEs per individual due to positive LD can be expressed as  $\rho = 1 + \mathcal{E}_1 (u + v + \alpha) / 2$ ; however, it is shown in the Supplementary Methods that a more accurate approximation for the case of tight linkage (small chromosome map length  $R$ , so that  $\mathcal{E}_1$  may be large) is given by:

$$\rho \approx 1 + \frac{\mathcal{E}_1}{1 - u \mathcal{E}_1} \frac{u + v + \alpha}{2}. \quad (14)$$

Figure 1 shows that equation 14 provides accurate predictions for the inflation in variance caused by LD among TEs under restricted recombination when  $Nu$  is sufficiently large and the mean number of elements per genome at equilibrium sufficiently small (e.g.,  $Nu = 100$ ,  $\bar{n} = 10$ , top right figure), while important discrepancies appear under tight linkage, when  $Nu$  is smaller and/or  $\bar{n}$  is larger. As we will see in the next subsection, these discrepancies are caused by negative LD generated by the Hill-Robertson effect in finite populations, that may lead to TE accumulation for parameter values

leading to high  $\bar{n}$  (bottom figures). Based on diffusion theory, the different parameters of the model should affect the results mostly through the  $Nu$ ,  $Nv$ ,  $N\alpha$ ,  $N\beta$  and  $NR$  products (e.g., Ewens, 2004; Dolgin and Charlesworth, 2006, 2008), and the deterministic and stochastic approximations derived here can indeed be expressed in terms of these quantities (see Supplementary Methods). As can be seen in Figure 1, this is confirmed by the fact that simulations performed using different values of  $N$  (but keeping these products constant) lead to very similar results.

Positive LD generated by transposition may also substantially inflate the variance in number of elements per individual in facultatively sexual populations with a low rate of sex or in highly selfing populations. This is confirmed by the simulation results shown in Figures 2 and S1 for partial selfing, and in Figures S2 and S3 for partial clonality. As can be seen on these figures, contrarily to the deterministic approximation obtained under random mating (equation 14, that tends to a finite limit as the chromosome map length  $R$  tends to zero), the approximations obtained under partial selfing and partial clonality diverge (*i.e.*, tend to infinity) as the rate of sex or outcrossing decreases, and the inflation in variance caused by positive LD indeed reaches larger values in the simulations — up to nearly five-fold for  $\bar{n} = 100$  under partial selfing (Figures 2, S1), and ten-fold under partial clonality (Figure S4). However, the simulations also show that below a threshold rate of sex or outcrossing, the average number of TEs per individual cannot be maintained at a stable equilibrium anymore: TEs are either eliminated from the population (in deterministic regimes where the positive LD generated by transposition predominates) or accumulate indefinitely (in stochastic regimes where the negative LD generated by the Hill-Robertson effect takes over), TE accumulation occurring more frequently when the initial number of elements is larger and when  $Nu$  is lower (for a fixed  $\bar{n}$ ). This confirms the results obtained previously by Dolgin and Charlesworth (2006), showing that a transition from sexual to asexual reproduction may either lead to the accumulation of TEs or to their elimination depending on parameter values.

Intuitively, the effect of negative epistasis should become stronger when the curvature of the fitness function increases. Figure 3 shows the results of simulations in which fitness is given by equation 8, the parameter  $\gamma$  controlling the curvature. As can be seen on the figure, increasing  $\gamma$  (while adjusting  $\beta$  to ensure that  $\bar{n}$  stays close to 10

under high recombination) indeed decreases the positive LD observed in the deterministic regime (high  $Nu$ ), LD becoming negative when  $\gamma$  is sufficiently high. However, one can note that LD stays positive over a wide range of values of  $\gamma$ , including  $\gamma = 3$ .

340

**The Hill-Robertson effect.** As shown in the Supplementary Methods, the effective strength of selection against each TE copy is approximately  $\alpha + \beta \bar{n}$  under random mating, which (using equation 11) is  $\approx u - v$  at equilibrium (Charlesworth, 1991). When epistasis is weak relative to the effective strength of selection (*i.e.*, when  $\beta \ll u - v$ ), previous results on the Hill-Robertson effect between deleterious alleles with independent fitness effects may be transposed to the present model. In particular, assuming that insertion frequencies  $p_i$  stay close to their deterministic values, extending the analysis of Roze (2021) to the current model yields:

$$\langle D_{ij} \rangle \approx \frac{1}{r_{ij} + 2u} \left[ \frac{u}{2L} (p_i + p_j) - \beta p_i p_j \right] - \frac{(u - v)^2}{N (r_{ij} + 2u)^2 (r_{ij} + 3u)} p_i p_j \quad (15)$$

where  $\langle D_{ij} \rangle$  is the expected value of  $D_{ij}$  at equilibrium (see Supplementary Methods for more details). The second term of equation 15 corresponds to the Hill-Robertson effect (negative LD generated by selection and drift). Using  $p_i \approx (u - v - \alpha) / (2L\beta)$  (from equation 11) yields the following approximation for  $\langle D_{ij} \rangle / \langle pq_{ij} \rangle$ , where  $\langle pq_{ij} \rangle$  is the expected value of  $p_i q_i p_j q_j$ :

$$\frac{\langle D_{ij} \rangle}{\langle pq_{ij} \rangle} \approx \frac{1}{r_{ij} + 2u} \frac{u + v + \alpha}{u - v - \alpha} \beta - \frac{(u - v)^2}{N (r_{ij} + 2u)^2 (r_{ij} + 3u)}. \quad (16)$$

As shown by Figure 4, the relative importance of the Hill-Robertson effect increases as recombination decreases, as  $Nu$  decreases (for a fixed expected number of TEs per individual  $\bar{n}$ ) and as  $\bar{n}$  increases (for a fixed  $Nu$ ). While  $\langle D_{ij} \rangle / \langle pq_{ij} \rangle$  is often negative in the case of tightly linked loci, it may be positive when  $Nu$  is sufficiently large, for parameter values leading to moderate  $\bar{n}$  (in this case, the deterministic effect of transposition predominates over the effects of epistasis and drift). Similar results are obtained in the case of partially selfing populations, LD between distant sites becoming more important when the selfing rate is high (Figure 4).

Summing equation 15 over all possible pairs of sites yields the following approximation for the effect of LD on the variance in the number of elements per individual:

$$\rho \approx 1 + \frac{1}{1 - u \mathcal{E}_1} \left[ \mathcal{E}_1 \frac{u + v + \alpha}{2} - \mathcal{E}_4 \frac{(u - v)^2}{2N} \frac{u - v - \alpha}{\beta} \right] \quad (17)$$

where  $\mathcal{E}_4$  is the average of  $1/[(r_{ij} + 2u)^2(r_{ij} + 3u)]$  over all possible pairs of insertion  
 365 sites. Note that  $N$  in equation 17 should correspond to the effective population size  $N_e$ ,  
 that may vary with respect to genomic location according to local interference effects  
 among loci. With the genomic architecture considered here (single chromosome with  
 map length  $R$  and a uniform density of crossovers),  $N_e$  may be significantly reduced by  
 background selection effects caused by segregating TEs when  $R$  is small (Charlesworth,  
 370 1996), loci present in the central part of the chromosome being more strongly affected  
 than loci located at the extremities. An analysis presented in the Supplementary  
 Methods shows that the negative LD generated by the Hill-Robertson effect between  
 TEs segregating at sites  $i$  and  $j$  is amplified by the presence of an element segregating  
 at a third site  $k$ ; the effect of background selection on  $\langle D_{ij} \rangle$  can then be approximated  
 375 by integrating over all possible positions of site  $k$  along the chromosome. Using this  
 method (that involves numerically integrating over all possible triplets of sites  $i, j,$   
 $k$ ) generates the dashed curves in Figure 1, that better match the simulation results  
 than the deterministic approximation in the top figures ( $\bar{n} = 10$ ), and predict strongly  
 negative LD in the parameter region where TEs accumulate in the bottom figures  
 380 ( $\bar{n} = 100$  at the deterministic equilibrium).

The results shown above can be extended to the case where  $f$  different TE  
 families are segregating in the population (see Supplementary Methods). In this case,  
 two forms of LD can be distinguished: between elements from the same family, or from  
 different families. While the first type of LD (within family) is affected by transpo-  
 385 sition, epistasis and the Hill-Robertson effect (and may thus be positive or negative  
 depending on the relative importance of deterministic and stochastic effects), the sec-  
 ond type of LD (between families) is only generated by the Hill-Robertson effect and  
 should therefore always be negative. This is confirmed by the simulation results shown  
 in Figure 5, the approximations derived in the Supplementary Methods providing cor-  
 390 rect predictions in regimes where the number of TEs per individual is maintained  
 at a stable equilibrium. As can be seen on the bottom right figure, the sum of all  
 linkage disequilibria (within and between families) is positive when  $R$  is sufficiently  
 large (due to the positive LD within families generated by transposition), and becomes  
 negative under weak recombination as the Hill-Robertson effect takes over (the tran-  
 395 sition occurring at higher values of  $R$  when the number of TE families  $f$  increases,



due to stronger interference effects). Note that the present model assumes no epistasis between TEs from different families; introducing negative epistasis between pairs of elements from different families would tend to make LD among them more negative.

#### 400 **Evolution of recombination.**

Two different types of selective force may act on a modifier locus affecting recombination rates: direct forces caused by direct fitness effects of the modifier, and indirect forces generated by linkage disequilibria between the modifier and selected loci. In the present model, a direct selective force against recombination is generated by the fitness cost caused by ectopic recombination among TEs, 405 when meiotic recombination rates and rates of ectopic recombination are positively correlated (i.e.,  $\theta > 0$  in equation 10). Indirect selection is generated by two different effects: (i) the disruption of LD among TEs by recombination, and (ii) stronger selection against TEs due to increased ectopic recombination, when  $\theta > 0$  (Charlesworth and Barton, 1996). These different selective forces are quantified in the Supplementary Methods, assuming that the chromosome map length  $R$  is not too small, so that 410 the effect of LD among TEs on the variance in  $n$  among individuals remains weak. This analysis shows that increasing the rate of ectopic recombination among TEs is always disadvantageous: although it allows a better purging of TEs (as well as other indirect effects described in the Supplementary Methods), this does not compensate 415 for the direct fitness cost associated with ectopic recombination. Therefore, increasing the correlation between the rate of ectopic recombination and meiotic recombination rates (by increasing  $\theta$ ) disfavors recombination. By contrast, breaking LD among TEs may be beneficial or not depending on parameter values. In the deterministic regime where the Hill-Robertson effect is negligible, linkage disequilibria among TEs are positive, increasing the variance in the number of elements per genome. While breaking 420 positive LD is beneficial in the short term when epistasis is negative (as it increases the mean fitness of offspring), it reduces the variance in fitness among offspring and thus decreases the efficiency of selection against TEs. This effect on the variance in fitness predominates over the effect on mean fitness in most cases, so that breaking 425 positive LD is disfavored. The effect on mean fitness may be stronger than the effect on the variance when  $R$  is high and  $\bar{n}$  is low (in which case breaking positive LD is beneficial), but indirect selection is then extremely weak and easily overwhelmed by

any slight direct fitness effect of the modifier. By contrast, recombination is beneficial in regimes where the Hill-Robertson effect predominates, generating negative LD: in this case, recombination increases the variance in fitness and the efficiency of selection. Because LD tends to be positive when  $R$  is high and negative at lower values of  $R$  (e.g., Figure 5), indirect selection generated by LD among TEs is expected to favor intermediate recombination rates, at least when the number of TE copies per genome is not too small.

From the analysis presented in the Supplementary Methods, the expected change in frequency of allele  $m$  (that increases the map length of the chromosome by an amount  $\delta R$ ) can be decomposed as:

$$\langle \Delta p_m \rangle \approx (s_{\text{dir}} + s_{\text{ind,det}} + s_{\text{ind,HR}}) p_m q_m \quad (18)$$

where  $s_{\text{dir}}$  is the strength of direct selection against recombination (due to the deleterious effect of ectopic recombination among TEs), and  $s_{\text{ind,det}}$ ,  $s_{\text{ind,HR}}$  the strength of indirect selection generated by deterministic and stochastic effects, respectively. Assuming that  $\delta R$  is small,  $s_{\text{dir}}$  is approximately:

$$s_{\text{dir}} \approx -\frac{\delta R}{4} \theta \tilde{\beta} f \bar{n}^2. \quad (19)$$

As discussed above, the deterministic component of indirect selection  $s_{\text{ind,det}}$  is often mostly driven by the negative effect of reducing the variance in fitness among offspring, in which case it can be approximated by (assuming  $v, \alpha \ll u$ ):

$$s_{\text{ind,det}} \approx -\frac{\delta R}{2R} \mathcal{E} \left[ \frac{r_{ij}}{(r_{mi} + u)(r_{ij} + 2u)(r_{mij} + 2u)} \right] \frac{u^3 f \bar{n}}{4} \quad (20)$$

where  $\mathcal{E}$  is the average over all possible pairs of insertions sites  $i$  and  $j$ , and where  $r_{mij} = (r_{mi} + r_{mj} + r_{ij})/2$  is the probability that at least one crossover occurs among the three loci.

An approximation for the stochastic component of indirect selection  $s_{\text{ind,HR}}$  can be obtained from the expression derived in Roze (2021) for the strength of selection for recombination generated by the Hill-Robertson effect between deleterious mutations (see Supplementary Methods). When  $R \gg u$ , one obtains:

$$s_{\text{ind,HR}} \approx \frac{\delta R}{2} \frac{1.8}{N_e R^3} \left( \frac{u f \bar{n}}{2} \right)^2 \quad (21)$$

corresponding to equation 1 in Roze (2021), adapted to the present model. Indeed, the strength of selection for recombination generated by interference among deleterious mutations is proportional to the squared fitness effect of deleterious alleles, multiplied by the squared mean number of mutations per chromosome, yielding  $(sh)^2 \times (U/sh)^2 = U^2$  in the case of deleterious mutations (where  $U$  is the deleterious mutation rate per chromosome and  $sh$  the heterozygous fitness effect of mutations), and  $u^2 \times (f\bar{n}/2)^2$  in the present model. Although the effective population size may be reduced by background selection effects,  $N_e$  should stay relatively constant along the chromosome as long as  $R$  is not too small (given that the model assumes a uniform distribution of crossovers along the chromosome), in which case the effect of segregating TEs on  $N_e$  is approximately  $N_e \approx N \exp(-uf\bar{n}/R)$  (Hudson and Kaplan, 1995; Charlesworth, 1996).

Figure 6 shows the evolutionarily stable chromosome map length  $R_{ES}$  as a function of the parameter  $\theta$  measuring the direct cost of recombination, for different numbers of TE families  $f$  and for parameter values leading to  $\bar{n} \approx 10$  (per family) at the deterministic equilibrium. In the case of a single TE family ( $f = 1$ ), the Hill-Robertson effect is not sufficiently strong (relative to direct selection and to the deterministic component of indirect selection) to maintain recombination:  $R$  is predicted to evolve towards zero, which is confirmed by the simulation results. The Hill-Robertson effect becomes more important when larger numbers of elements are segregating, the approximations shown above predicting values of  $R_{ES}$  in the range 0.1 – 0.4 with 10 or 20 TE families, even when the cost of recombination is high (green and red curves in Figure 6). However, while the simulations agree with the analytical results when the cost of recombination is weak, above a threshold value of  $\theta$  (to the right of the right-most green and red dots on Figure 6)  $R_{ES}$  becomes too small to maintain TEs at a stable equilibrium, and the number of TEs per individual quickly reaches very high values. This threshold is reached sooner (*i.e.*, at lower values of  $\theta$ ) when  $Nu$  is smaller (for a fixed  $\bar{n}$  at deterministic equilibrium) or when  $\bar{n}$  is higher (results not shown). Overall, assuming substantial direct costs of recombination (due to a positive correlation between  $R$  and the rate of ectopic recombination) generally drives the evolution of  $R$  below the minimal value at which TEs can be maintained at a stable equilibrium.

## DISCUSSION

Theoretical models developed in the early 1980s identified two main mechanisms that may limit the spread of TEs within their host genomes (Charlesworth and Charlesworth, 1983; Kelleher et al., 2020): copy-number-dependent transposition (lower rates of transposition as the number of elements increase), and synergistic purifying selection. While transcriptional and post-transcriptional silencing of TEs correspond to plausible mechanisms generating copy-number-dependent transposition (Deniz et al., 2019; Kelleher et al., 2020; Almeida et al., 2022), ectopic recombination has been identified as a possible source of synergistic epistasis among elements (Montgomery et al., 1987; Langley et al., 1988). Indirect evidence suggests that ectopic recombination likely plays an important role in the containment of TEs (Bartolomé et al., 2002; Song and Boissinot, 2007; Petrov et al., 2011; Bonchev and Willi, 2018); however, to what extent this process generates synergistic selection against TE copies remains difficult to test. Recently, Lee (2022) used population genomic data from *D. melanogaster* to infer the degree of synergism among TEs from patterns of linkage disequilibrium between elements, based on the assumption that synergistic epistasis generates negative LD. The results showed positive LD between tightly linked TEs, but negative LD between more distant TEs. While positive LD may have been generated by admixture among divergent populations (Sohail et al., 2017; Sandler et al., 2021) or by the fact that the analysis was restricted to TE insertions present in a small number of individuals (Good, 2022), negative LD among distant TEs was interpreted as evidence for synergistic epistasis.

The present paper shows that classical results on the effect of epistasis on LD between deleterious mutations cannot be directly transposed to TEs, however, due to the fact that the transposition process is a source of positive LD among elements. Under the assumptions of the classical model of synergistic purifying selection against TEs used in this paper (Charlesworth, 1991; Dolgin and Charlesworth, 2006, 2008), the effect of transposition is stronger than the effect of negative epistasis and generates positive LD at equilibrium. Strikingly, in an infinite population the LD between loosely linked loci scaled by the product of genetic variances at both loci ( $D_{ij}/p_i q_i p_j q_j$ ) is approximately  $\beta/r_{ij}$  (where  $\beta$  is the strength of synergistic epistasis, see equation 16),

and thus exactly opposite to the result obtained in the case of deleterious mutations  
 515  $(-\beta/r_{ij}$ , e.g., Barton, 1995). Negative LD may be generated by the Hill-Robertson ef-  
 fect in finite populations, however, the relative importance of this effect increasing with  
 the degree of linkage among loci. In a large population with frequent recombination,  
 the sum of all LD among TEs is predicted to be slightly positive, the distribution of  
 the number of TEs per genome staying very close to a Poisson distribution. Within the  
 520 genome, LD between closely linked insertion sites may be either positive or negative  
 depending on the relative importance of deterministic and stochastic effects (Figure  
 4).

These predictions seem at odds with the observation of negative LD between  
 insertions present on different chromosomes of *D. melanogaster* (Lee, 2022). Negative  
 525 LD between loosely linked loci could arise due to the Hill-Robertson effect in the  
 present model, but only in the case of a very low effective population size, which  
 seems unlikely given that the source population shows high genetic diversity and very  
 low spatial structure (Lack et al., 2015). Epistasis may also generate negative LD  
 despite the positive effect of transposition under some forms of fitness functions, but  
 530 Figure 3 indicates that the curvature of the fitness function has to be quite strong for  
 the effect of epistasis to take over. Alternatively, the discrepancy between theoretical  
 and empirical results raises the possibility that the model considered here does not  
 provide an adequate representation of transposon dynamics in natural populations.  
 Various extensions of the model would be worth exploring, introducing for example  
 535 different probabilities of ectopic recombination between pairs of elements separated  
 by different genomic distances, or insertion biases of new TE copies. Furthermore,  
 the present model does not include any mechanism of host regulation of transposition.  
 TE silencing mechanisms have been increasingly well described over recent years; in  
 particular, the system based on Piwi-interacting RNAs (which inactivates TEs once  
 540 an element has inserted into a piRNA cluster) is present in a variety of organisms  
 and generates a form of copy-number-dependent transposition (Brennecke et al., 2007;  
 Gunawardane et al., 2007; Kelleher et al., 2020). Several models of TE dynamics  
 incorporating silencing through piRNAs have been proposed recently (Kelleher et al.,  
 2018; Kofler, 2019, 2020; Kofler et al., 2022; Tomar et al., 2022), and it would be  
 545 interesting to explore how host regulation may affect LD patterns among TEs using

this type of models.

From a more general perspective, the present results help to reconcile two different views on the effect of reproductive systems and recombination on TE dynamics: on one hand, sexual reproduction is assumed to favor the spread of TEs (Hickey, 1982) while on the other hand, the lack of recombination may lead to TE accumulation through Muller’s ratchet (Arkhipova and Meselson, 2005a; Dolgin and Charlesworth, 2008). When population size is large and recombination is frequent, the Hill-Robertson effect among TEs often stays negligible and the main effect of recombination is to decrease the excess variance in TE number caused by the transposition process, thus helping the spread of TEs (in agreement with Hickey’s view). However, the Hill-Robertson effect may predominate when population size is small and/or recombination is rare, in particular when the number of TEs per genome is large: in this case, recombination increases the effect of selection against TEs. This also sheds light on the simulation results obtained by Dolgin and Charlesworth (2006), showing that a transition towards asexuality may either lead to an accumulation of TEs or to their elimination, the second outcome occurring above a threshold population size (and requiring TE excision if all individuals are initially loaded with TEs). To date, empirical comparisons between sexual and asexual species have not shown any clear trend. While the first TE surveys in the putatively ancient asexual bdelloid rotifers suggested a low TE content (Arkhipova and Meselson, 2000, 2005b), more recent work has shown a similar level of TE content and activity to what is observed in sexual rotifer species (Nowell et al., 2021). Similarly, comparisons of closely related sexual and asexual arthropod species showed little difference in TE content (Bast et al., 2016; Jaron et al., 2022). However, it is possible that extant asexual species originated from sexual ancestors in which the level of TE activity was low, while new asexual lineages in which TE activity is high tend to go extinct due to TE accumulation (Arkhipova and Meselson, 2005a), and it would thus be of interest to explore TE dynamics in newly derived asexual lineages. Transitions towards self-fertilization may also either lead to an increased or decreased efficiency of selection against TEs depending on the relative importance of deterministic and stochastic forces, with the additional effect that homozygosity may decrease the rate of ectopic recombination among elements (Montgomery et al., 1991; Wright and Schoen, 1999; Morgan, 2001; Bonchev and Willi, 2018). Measuring LD

among TEs in selfing or asexual populations (and contrasting LD within and between TE families) may shed further light on the selective forces acting on TEs, and should  
580 be made easier by the recent development of long-reads sequencing technologies.

Linkage disequilibrium between selected sites is the source of indirect selection on recombination modifier alleles (Felsenstein, 1974). In classical models of deleterious mutations, synergistic epistasis generates negative LD, causing recombination to decrease the mean fitness of offspring, but increase the variance in fitness and  
585 the efficiency of selection. The benefit of increasing the variance in fitness becomes stronger than the short-term cost of reducing mean fitness as recombination decreases, so that non-zero rates of recombination are predicted to be maintained at equilibrium (Charlesworth, 1990; Barton, 1995; Charlesworth and Barton, 1996). In the deterministic regime of the present model, positive LD among TEs is maintained despite  
590 synergistic epistasis and recombination therefore has opposite effects, increasing the mean fitness of offspring but decreasing the variance in fitness. The disadvantage caused by the reduced efficiency of selection often predominates (in particular when the number of TEs per genome is large), disfavoring recombination. However, interference effects caused by finite population size favor recombination and tend to  
595 become stronger than deterministic effects as recombination decreases: in the absence of any direct fitness cost of recombination, this may favor the maintenance of high crossover rates when the number of TEs per chromosome is large. It seems likely that ectopic recombination among TEs will generate a direct fitness cost for recombination, however, and in the present model, this direct cost tends to drive the crossover rate  
600 towards values at which TEs cannot be maintained at a stable equilibrium anymore. Here again, using models of TE bursts followed by silencing through host regulation would be of interest, as a burst of TEs may transiently favor or disfavor recombination depending on the balance between the direct cost of ectopic recombination and interference effects. The joint evolution of local TE density and local recombination  
605 rate, or the effect of interactions between TEs and classical deleterious mutations may also be worth exploring. From an empirical perspective, more detailed knowledge on ectopic recombination among TEs is needed in order to better assess its potential consequences: in particular, to what extent it correlates with meiotic recombination rates, whether it may occur among silenced TEs, and how the physical distance among

TEs may affect the probability of ectopic exchange. More generally, assessing the relative contribution of segregating TEs to the variance in fitness within populations would help us to better understand the evolutionary consequences of our load of selfish DNA.

**Data availability.** Derivations are provided in the *Mathematica* notebook available as Supplementary Material at [doi.org/10.5281/zenodo.7233938](https://doi.org/10.5281/zenodo.7233938), along with the C++ codes used to run the simulations.

**Acknowledgements.** I thank the Bioinformatics and Computing Service of Roscoff's Biological Station (Abims platform) for computing time, and Arnaud Le Rouzic for useful comments.

**Funding.** This work was funded by the Agence Nationale pour la Recherche (SelfRecomb project: ANR-18-CE02-0017-02, and GenAsex project: ANR-17-CE02-0016-01).

**Competing interests.** None declared.



## LITERATURE CITED

- Almeida, M. V., G. Vernaz, A. L. K. Putman, and E. A. Miska. 2022. Taming transposable elements in vertebrates: from epigenetic silencing to domestication. *Trends Genet.* 38:529–553.
- 630 Arkhipova, I. R. and M. Meselson. 2000. Transposable elements in sexual and ancient asexual taxa. *Proc. Natl. Acad. Sci. U. S. A.* 97:14473–14477.
- . 2005a. Deleterious transposable elements and the extinction of asexuals. *BioEssays* 27:76–85.
- . 2005b. Diverse DNA transposons in rotifer of the class Bdelloidea. *BioEssays*  
635 102:11781–11786.
- Bartolomé, C., X. Maside, and B. Charlesworth. 2002. On the abundance and distribution of transposable elements in the genome of *Drosophila melanogaster*. *Mol. Biol. Evol.* 19:926–937.
- Barton, N. H. 1995. A general model for the evolution of recombination. *Genet. Res.*  
640 65:123–144.
- Barton, N. H. and S. P. Otto. 2005. Evolution of recombination due to random drift. *Genetics* 169:2353–2370.
- Bast, J., J. Schaefer, T. Schwander, M. Maraun, S. Scheu, and K. Kraaijeveld. 2016. No accumulation of transposable elements in asexual arthropods. *Mol. Biol. Evol.*  
645 33:697–706.
- Biémont, C., A. Tsitrone, C. Vieira, and C. Hoogland. 1997. Transposable element distribution in *Drosophila*. *Genetics* 147:1997–1999.
- Bonchev, G. and Y. Willi. 2018. Accumulation of transposable elements in selfing populations of *Arabidopsis lyrata* supports the ectopic recombination model of transposon  
650 evolution. *New Phytol.* 219:767–778.

Brand, C. L., M. V. Cattani, S. B. Kingan, E. L. Landeen, and D. C. Presgraves. 2018. Molecular evolution at a meiosis gene mediates species differences in the rate and patterning of recombination. *Curr. Biol.* 28:1289–1295.

Brennecke, J., A. A. Aravin, A. Stark, M. Dus, M. Kellis, R. Sachidanandam, and  
655 G. J. Hannon. 2007. Discrete small RNA-generating loci as master regulators of transposon activity in *Drosophila*. *Cell* 128:1089–1103.

Charlesworth, B. 1990. Mutation-selection balance and the evolutionary advantage of sex and recombination. *Genet. Res.* 55:199–221.

———. 1991. Transposable elements in natural populations with a mixture of selected  
660 and neutral insertion sites. *Genet. Res.* 57:127–134.

———. 1996. Background selection and patterns of genetic diversity in *Drosophila melanogaster*. *Genet. Res.* 68:131–149.

Charlesworth, B. and N. H. Barton. 1996. Recombination load associated with selection for increased recombination. *Genet. Res.* 67:27–41.

665 Charlesworth, B. and D. Charlesworth. 1983. The population dynamics of transposable elements. *Genet. Res.* 42:1–27.

Charlesworth, B., C. H. Langley, and P. D. Sniegowski. 1997. Transposable element distributions in *Drosophila*. *Genetics* 147:1993–1995.

Cordaux, R. and M. A. Batzer. 2009. The impact of retrotransposons on human  
670 genome evolution. *Nat. Rev. Genet.* 10:691–703.

Deniz, O., J. M. Frost, and M. R. Branco. 2019. Regulation of transposable elements by DNA modifications. *Nat. Rev. Genet.* 20:417–431.

Dolgin, E. S. and B. Charlesworth. 2006. The fate of transposable elements in asexual populations. *Genetics* 174:817–827.

675 ———. 2008. The effects of recombination rate on the distribution and abundance of transposable elements. *Genetics* 178:2169–2177.

Doolittle, W. F. and C. Sapienza. 1980. Selfish genes, the phenotype paradigm and genome evolution. *Nature* 284:601–603.

Duret, L., G. Marais, and C. Biémont. 2000. Transposons but not retrotransposons  
680 are located preferentially in regions of high recombination rate in *Caenorhabditis elegans*. *Genetics* 156:1661–1669.

Ewens, W. J. 2004. *Mathematical Population Genetics. I. Theoretical Introduction*. Springer, Berlin.

Felsenstein, J. 1965. The effect of linkage on directional selection. *Genetics* 52:349–363.

685 ———. 1974. The evolutionary advantage of recombination. *Genetics* 78:737–756.

Good, B. H. 2022. Linkage disequilibrium between rare mutations. *Genetics* 220:iyac004.

Goodier, J. L. 2016. Restricting retrotransposons: a review. *Mob. DNA* 7:16.

Gunawardane, L. S., K. Saito, K. M. Nishida, K. Miyoshi, Y. Kawamura, T. Nagami,  
690 H. Siomi, and M. Siomi. 2007. A slicer-mediated mechanism for repeat-associated siRNA 5' end formation in *Drosophila*. *Science* 315:1587–1590.

Hancks, D. C. and H. H. Kazazian. 2016. Roles for retrotransposon insertions in human disease. *Mob. DNA* 7:9.

Hedges, D. J. and P. L. Deininger. 2007. Inviting instability: transposable elements,  
695 double-strand breaks, and the maintenance of genome integrity. *Mut. Res.* 616:46–59.

Hickey, D. A. 1982. Selfish DNA: a sexually transmitted nuclear parasite. *Genetics* 101:519–531.

Hill, W. G. and A. Robertson. 1966. The effect of linkage on limits to artificial selection.  
700 *Genet. Res.* 8:269–294.

Hudson, R. R. and N. L. Kaplan. 1995. Deleterious background selection with recombination. *Genetics* 141:1605–1617.

- Jaron, K. S., D. J. Parker, Y. Anselmetti, P. Tran Van, J. Bast, Z. Dumas, E. Figuet, C. M. François, K. Hayward, V. Rossier, P. Simion, M. Robinson-Rechavi, N. Galtier, and T. Schwander. 2022. Convergent consequences of parthenogenesis on stick insect genomes. *Sci. Adv.* 8:eabg3842.
- Keightley, P. D. and S. P. Otto. 2006. Interference among deleterious mutations favours sex and recombination in finite populations. *Nature* 443:89–92.
- Kelleher, E. S., R. B. R. Azevedo, and Y. Zheng. 2018. the evolution of small-RNA-mediated silencing of an invading transposable element. *Genome Biol. Evol.* 10:3038–3057.
- Kelleher, E. S., D. A. Barbash, and J. P. Blumenstiel. 2020. Taming the turmoil within: new insights on the containment of transposable elements. *Trends Genet.* 36:474–488.
- Kent, T. V., J. Uzunović, and S. I. Wright. 2017. Coevolution between transposable elements and recombination. *Phil. Trans. Roy. Soc. (Lond.) B* 372:20160458.
- Kofler, R. 2019. Dynamics of transposable element invasions with piRNA clusters. *Mol. Biol. Evol.* 36:1457–1472.
- . 2020. piRNA clusters need a minimum size to control transposable element invasions. *Genome Biol. Evol.* 12:736–749.
- Kofler, R., V. Nolte, and C. Schlötterer. 2022. The transposition rate has little influence on the plateauing level of the P-element. *Mol. Biol. Evol.* 39:msac141.
- Lack, J. B., C. M. Cardeno, M. W. Crepeau, W. Taylor, R. B. Corbett-Detig, K. A. Stevens, C. H. Langley, and J. E. Pool. 2015. The *Drosophila* genome nexus: a population genomic resource of 623 *Drosophila melanogaster* genomes, including 197 from a single ancestral range population. *Genetics* 199:1229–1241.
- Langley, C. H., E. Montgomery, R. Hudson, N. Kaplan, and B. Charlesworth. 1988. On the role of unequal exchange in the containment of transposable element copy number. *Genet. Res.* 52:223–235.

- 730 Lee, Y. C. G. 2022. Synergistic epistasis and the deleterious effects of transposable elements. *Genetics* 220:iyab211.
- Montgomery, E., B. Charlesworth, and C. H. Langley. 1987. A test for the role of natural selection in the stabilization of transposable element copy number in a population of *Drosophila melanogaster*. *Genet. Res.* 49:31–41.
- 735 Montgomery, E. A., S.-M. Huang, C. H. Langley, and B. H. Judd. 1991. Chromosome rearrangement by ectopic recombination in *Drosophila melanogaster*: genome structure and evolution. *Genetics* 129:1085–1098.
- Morgan, M. T. 2001. Transposable element number in mixed mating populations. *Genet. Res.* 77:261–275.
- 740 Muller, H. J. 1964. The relation of recombination to mutational advance. *Mut. Res.* 1:2–9.
- Nowell, R. W., C. G. Wilson, P. Almeida, P. H. Schiffer, D. Fontaneto, L. Becks, F. Rodriguez, I. R. Arkhipova, and T. G. Barraclough. 2021. Evolutionary dynamics of transposable elements in bdelloid rotifers. *eLife* 10:e63194.
- 745 Nuzhdin, S. V. 1999. Sure facts, speculations and open questions about the evolution of transposable element copy number. *Genetica* 107:129–137.
- Orgel, L. E. and F. H. C. Crick. 1980. Selfish DNA: the ultimate parasite. *Nature* 284:604–607.
- Payer, L. M. and K. H. Burns. 2019. Transposable elements in human genetic disease. 750 *Nat. Rev. Genet.* 20:760–772.
- Petrov, D. A., A.-S. Fiston-Lavier, M. Lipatov, K. Lenkov, and J. González. 2011. Population genomics of transposable elements in *Drosophila melanogaster*. *Mol. Biol. Evol.* 28:1633–1644.
- Roze, D. 2021. A simple expression for the strength of selection on recombination generated by interference among mutations. *Proc. Natl. Acad. Sci. U. S. A.* 755 118:e2022805118.

Sandler, G., S. I. Wright, and A. F. Agrawal. 2021. Patterns and causes of signed linkage disequilibria in flies and plants. *Mol. Biol. Evol.* 38:4310–4321.

Sohail, M., O. A. Vakhrusheva, J. Hoon Sul, S. L. Pulit, L. C. Francioli, Genome  
760 of the Netherlands Consortium, Alzheimer’s Disease Neuroimaging Initiative, L. H.  
van den Berg, J. H. Veldink, P. I. W. de Bakker, G. A. Bazykin, A. S. Kondrashov,  
and S. R. Sunyaev. 2017. Negative selection in humans and fruit flies involves  
synergistic epistasis. *Science* 356:539–542.

Song, M. and S. Boissinot. 2007. Selection against LINE-1 retrotransposons results  
765 principally from their ability to mediate ectopic recombination. *Gene* 390:206–213.

Tomar, S. S., A. Hua-Van, and A. Le Rouzic. 2022. A population genetics theory  
for piRNA-regulated transposable elements. *bioRxiv* 2022.07.05.498868;doi:  
<https://doi.org/10.1101/2022.07.05.498868>.

Wells, J. N. and C. Feschotte. 2020. A field guide to eukaryotic transposable elements.  
770 *Ann. Rev. Gen.* 54:539–561.

Wright, S. I., N. Agrawal, and T. E. Bureau. 2003. Effects of recombination rate and  
gene density on transposable element distributions in *Arabidopsis thaliana*. *Genome*  
*Res.* 13:1897–1903.

Wright, S. I. and D. J. Schoen. 1999. Transposon dynamics and the breeding system.  
775 *Genetica* 107:139–148.

Zeyl, C. and G. Bell. 1996. Symbiotic DNA in eukaryotic genomes. *Trends Ecol. Evol.*  
11:10–15.

Zeyl, C., G. Bell, and D. M. Green. 1996. Sex and the spread of retrotransposon Ty3  
in experimental populations of *Saccharomyces cerevisiae*. *Genetics* 143:1567–1577.

780 **Table 1:** Parameters and variables of the model.

|                 |                                                                                                                                              |
|-----------------|----------------------------------------------------------------------------------------------------------------------------------------------|
| $u$             | Transposition rate                                                                                                                           |
| $v$             | Excision rate                                                                                                                                |
| $\alpha$        | Fitness effect of a single TE insertion                                                                                                      |
| $\beta$         | Coefficient of synergistic epistasis among TEs                                                                                               |
| $\gamma$        | Curvature of the fitness function (when fitness is given by equation 8)                                                                      |
| $f$             | Number of TE families                                                                                                                        |
| $\sigma$        | Rate of sex                                                                                                                                  |
| $s$             | Selfing rate                                                                                                                                 |
| $o = 1 - s$     | Outcrossing rate                                                                                                                             |
| $N$             | Population size                                                                                                                              |
| $L$             | Number of possible insertion sites (assumed very large)                                                                                      |
| $r_{ij}$        | Recombination rate between insertion sites $i$ and $j$                                                                                       |
| $R$             | Chromosome map length (in Morgans)                                                                                                           |
| $\delta R$      | Effect of recombination modifier on chromosome map length                                                                                    |
| $\theta$        | Effect of chromosome map length on the rate of synergistic epistasis among TEs (direct cost of recombination generated by ectopic exchanges) |
| $W$             | Fitness of an organism                                                                                                                       |
| $p_i$           | Frequency of TEs at site $i$ in the population                                                                                               |
| $D_{ij}$        | Linkage disequilibrium between TEs at sites $i$ and $j$                                                                                      |
| $n, \bar{n}$    | Number of TE copies in an individual, and mean number of TE copies per individual                                                            |
| $\text{Var}(n)$ | Variance in the number of TE copies per individual                                                                                           |
| $\rho$          | Effect of genetic associations among loci on the variance in TE number per individual ( $\rho = 1$ in the absence of effect)                 |

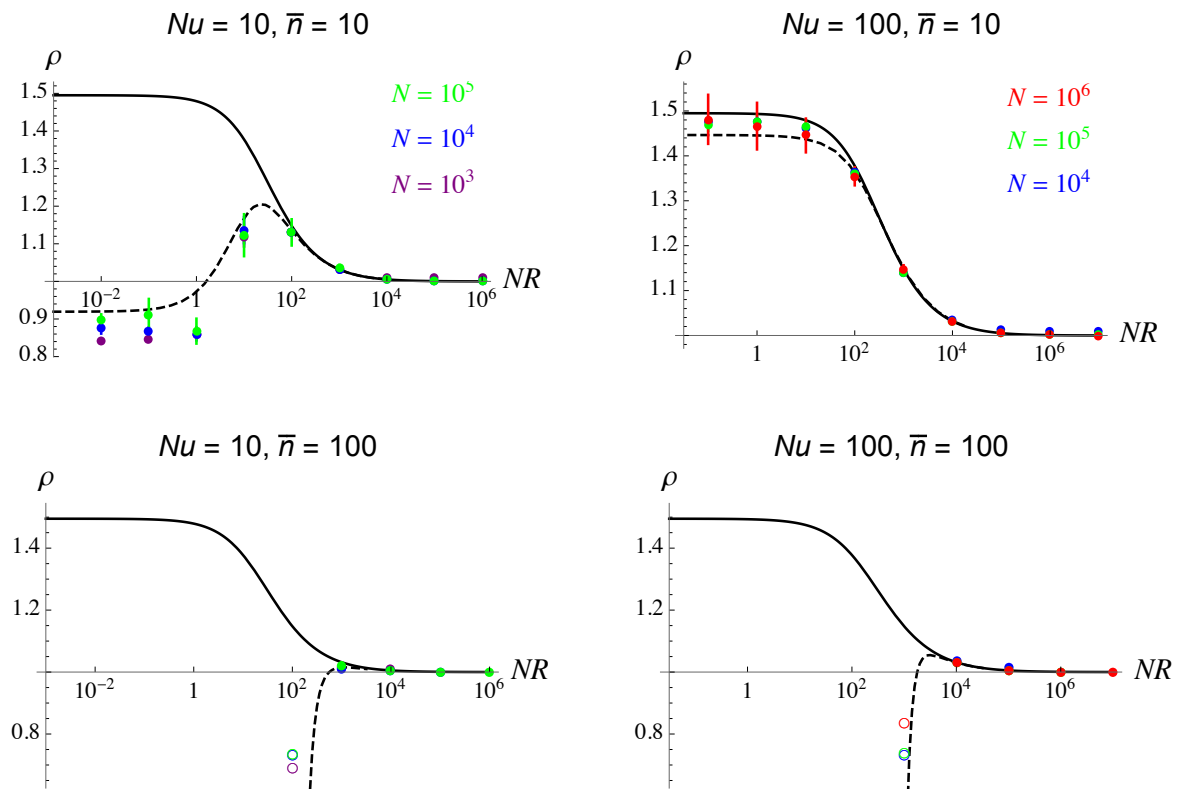

**Figure 1.** Effect of LD among TEs on the variance in TE number per individual ( $\rho$ ,  
 785 given by equation 6) as a function of the product of chromosome map length  $R$  and  
 population size  $N$  (on a log scale), for different values of  $Nu$  and  $\bar{n}$  (the mean number  
 of TEs per individual at the deterministic equilibrium, given by equation 11). Solid  
 curves: deterministic approximation (equation 14); dashed curves: stochastic approxi-  
 mation (including the Hill-Robertson effect, from equation A84 in the Supplementary  
 790 Methods). Dots: simulation results; the different colors correspond to different values  
 of population size  $N$ . Filled circles correspond to simulations during which the mean  
 number of TEs per individual equilibrates; error bars (that are often smaller than the  
 size of symbols) are obtained by dividing the last  $9 \times 10^6$  generations into 9 batches of  
 $10^5$  generations and computing the variance over batch means. Empty circles in the  
 795 bottom figures correspond to simulations during which TEs kept accumulating and  
 that had to be stopped (TE also accumulated in simulations with lower values of  $R$ );  
 the circles correspond to averages over the last 10 data points of the simulations (last  
 1000 generations). Parameter values:  $v = u/100$ ,  $\alpha = 0$ ,  $\beta = u/10$  (top figures) or  
 $u/100$  (bottom figures).



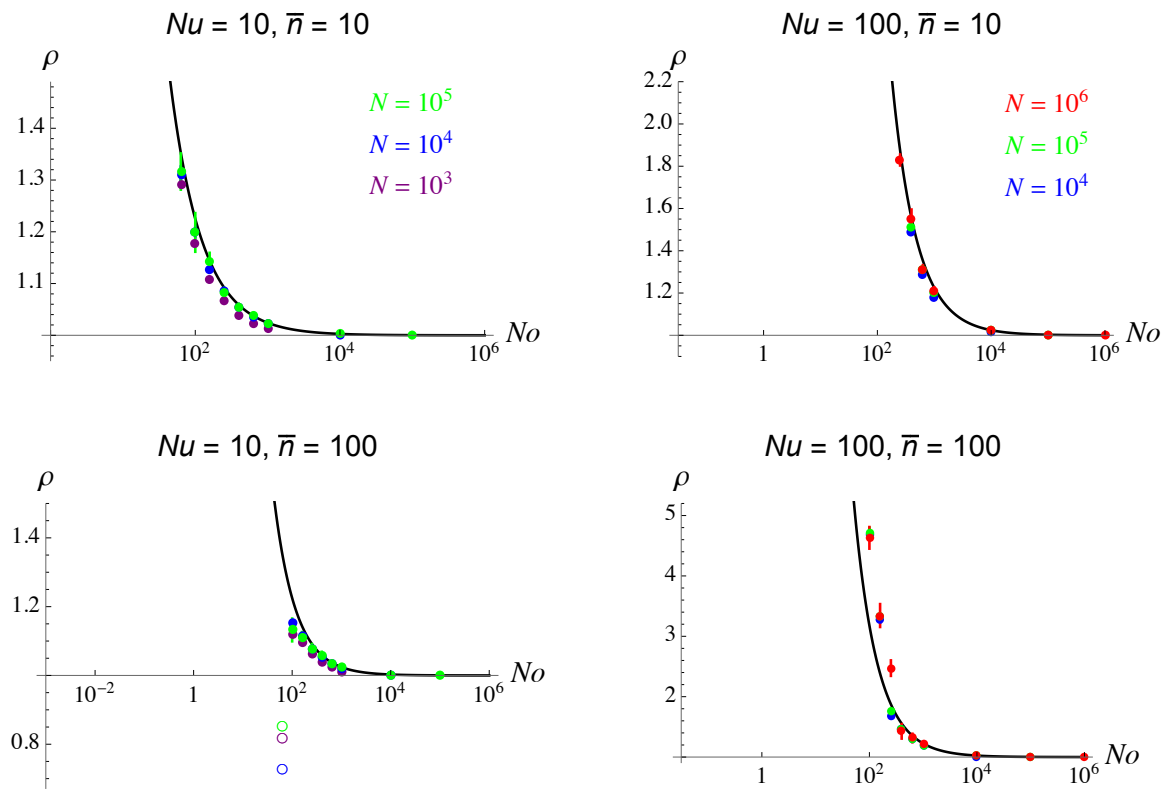

**Figure 2.** Effect of genetic associations among TEs at different sites on the variance in TE number per individual ( $\rho$ , given by equation 7) as a function of the product of chromosome map length  $R$  and the outcrossing rate  $o = 1 - s$  (on a log scale) in a partially selfing population, for different values of  $Nu$  and  $\bar{n}$  (the mean number of TEs per individual at the deterministic equilibrium under full outcrossing, given by equation 11). Curves correspond to the deterministic approximation given by equation A64 in the Supplementary Methods. Dots: simulation results; the different colors correspond to different values of population size  $N$ . On the left of the left-most filled circles of each figure, TEs are either eliminated from the population during the simulation or keep accumulating: TEs are eliminated in the top figures ( $\bar{n} = 10$ ), but accumulate in the bottom-left figure ( $Nu = 10, \bar{n} = 100$ ). As in Figure 1, the empty circles correspond to averages over the last 10 data points of the simulations. In the bottom-right figure ( $Nu = 100, \bar{n} = 100$ ) and when  $No < 10^2$ , TEs are eliminated when the initial average number of elements per individual  $n_{\text{init}}$  is set to 10, but accumulate when  $n_{\text{init}} = 100$ . Parameter values:  $v = u/100, \alpha = 0, \beta = u/10$  (top figures) or  $u/100$  (bottom figures).

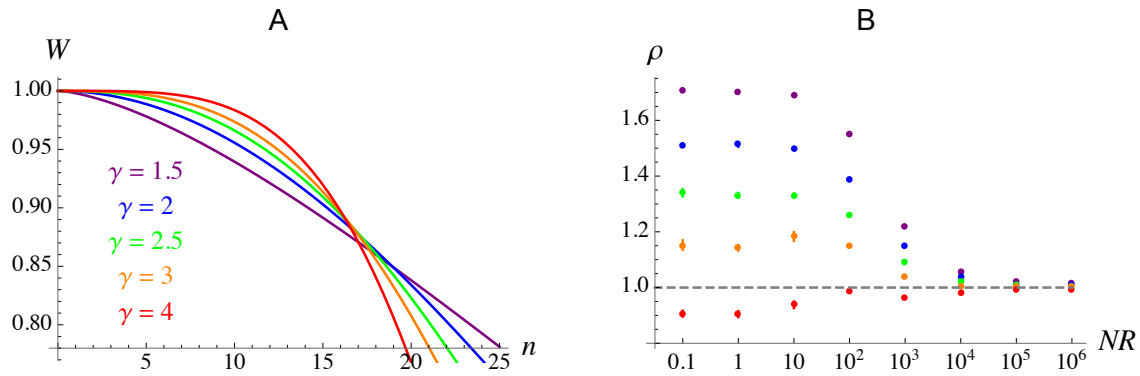

**Figure 3.** Shape of the fitness function (A) and effect of LD on the variance in TE number per individual as a function of  $NR$  (B) using the fitness function given by equation 8 and for different values of  $\gamma$ . Parameter values:  $N = 10^4$ ,  $u = 0.01$ ,  $v = 10^{-4}$ . For each value of  $\gamma$ , simulations were initially run with  $R = 10$  and a range of values of  $\beta$  in order to determine the value of  $\beta$  leading to  $\bar{n} = 10$  by interpolation. This led to  $\beta = 1.98 \times 10^{-3}$  ( $\gamma = 1.5$ ),  $4.54 \times 10^{-4}$  ( $\gamma = 2$ ),  $1.09 \times 10^{-4}$  ( $\gamma = 2.5$ ),  $2.67 \times 10^{-5}$  ( $\gamma = 3$ ) and  $1.65 \times 10^{-6}$  ( $\gamma = 4$ ).

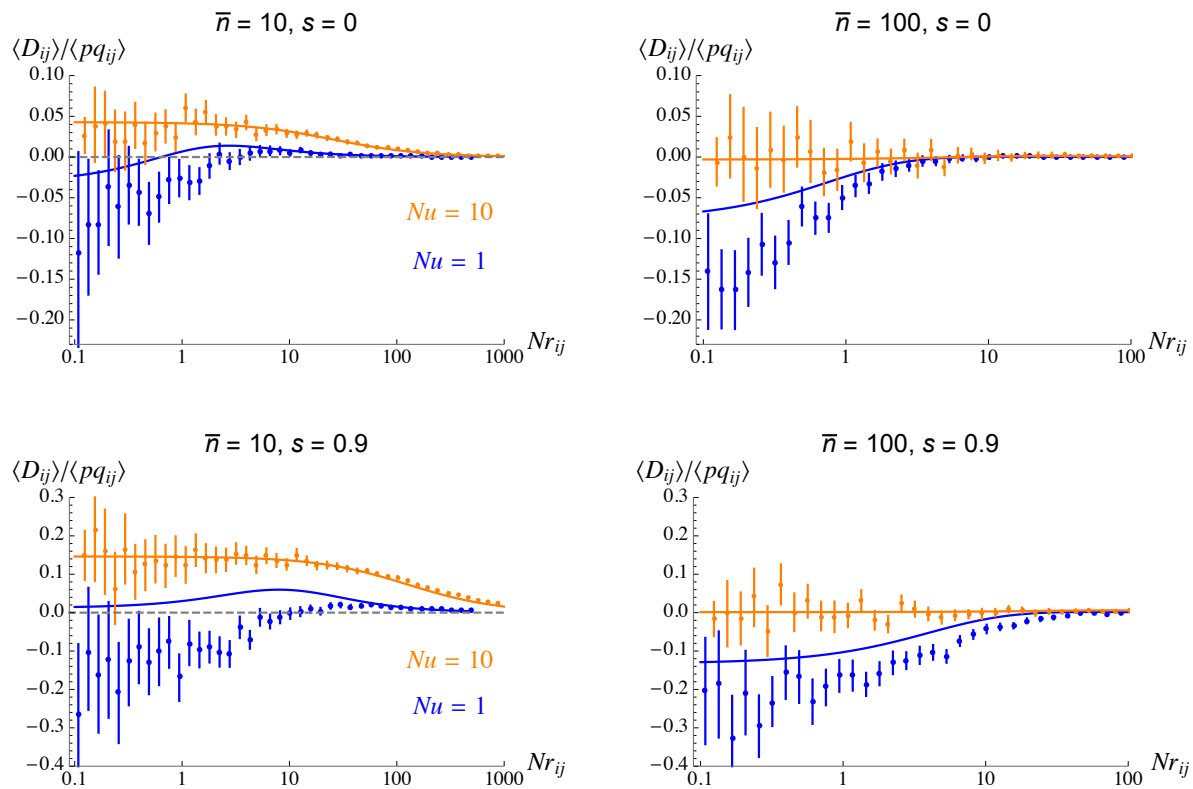

**Figure 4.** Average linkage disequilibrium between TE insertions at sites  $i$  and  $j$  divided by the average of  $p_i q_i p_j q_j$  (where  $p_i$  is the frequency of insertions at site  $i$  and  $q_i = 1 - p_i$ ) as a function of  $Nr_{ij}$  (on a log scale). Top figures: random mating; bottom figures: selfing rate  $s = 0.9$ . Curves correspond to analytical predictions from equations 16 (top) and A70 (bottom), and dots to simulation results for  $N = 10^4$  (orange) and  $N = 10^3$  (blue). In the simulations, all pairs of segregating sites (in samples of 200 individuals taken from the population) are split into batches of  $\log_{10} r_{ij}$ ,  $\langle D_{ij} \rangle$  and  $\langle pq_{ij} \rangle$  being computed for each batch over 1000 points per simulation (one every 1000 generations, 100 replicate samples being taken for each point) and large numbers of replicate simulations (up to 1000 for  $N = 10^3$ ). Parameter values:  $v = u/100$ ,  $\alpha = 0$ ,  $\beta = u/10$  (left) or  $u/100$  (right),  $NR = 10^4$  (in the simulations).

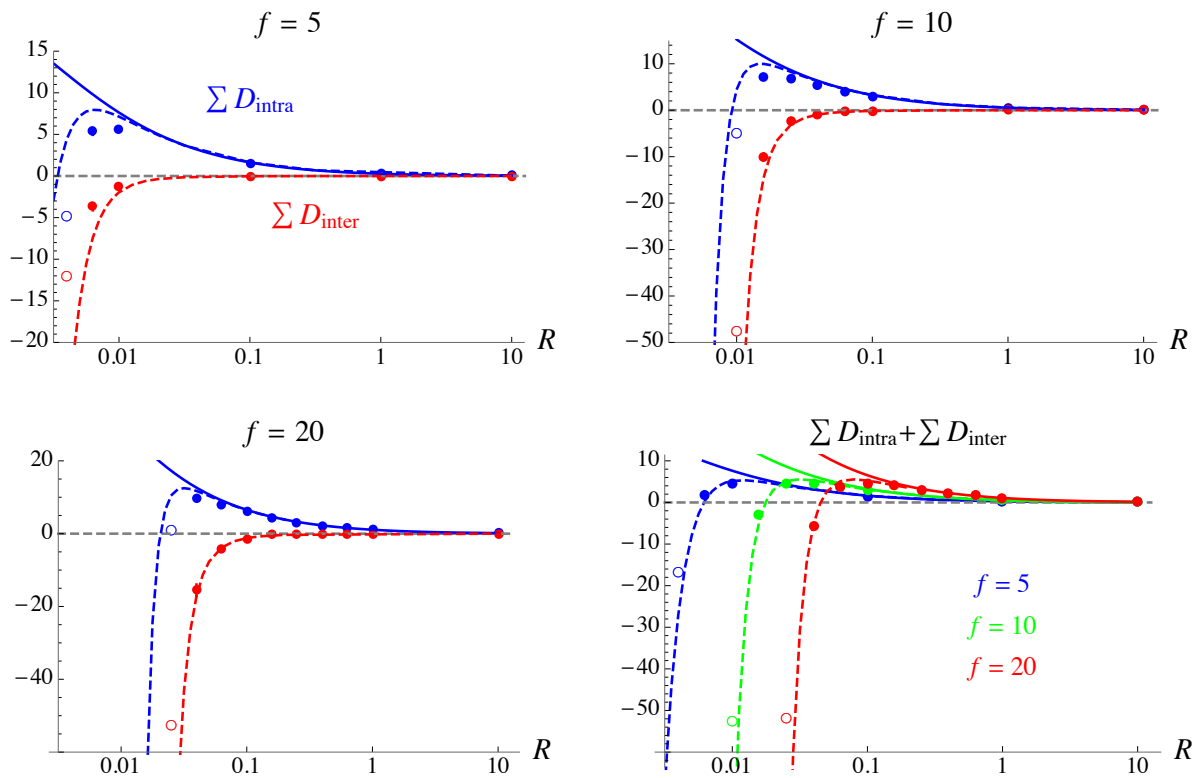

**Figure 5.** Top and bottom-left figures: sum of LD between pairs of elements from the same family (second sum in equation 9, blue), and sum of LD between elements from different families (third sum in equation 9, red), for different number of TE families segregating in the population ( $f = 5, 10, 20$ ). Solid curves: deterministic approximation (equation A89 in the Supplementary Methods, without the term in  $1/N$ ); dashed curves: stochastic approximations (equations A89 and A91 in the Supplementary Methods); dots: simulation results (error bars are smaller than the size of symbols). As in Figure 1, empty circles correspond to simulations during which TEs kept accumulating (the circles corresponding to the average over the last 10 data points of the simulations). Bottom-right figure: sum of all LD among TEs (within and between families); curves and symbols have the same meaning as in the other figures. Parameter values:  $N = 10^5$ ,  $u = 10^{-3}$ ,  $v = 10^{-5}$ ,  $\alpha = 0$ ,  $\beta = 10^{-4}$  ( $\bar{n} = 10$  per family).

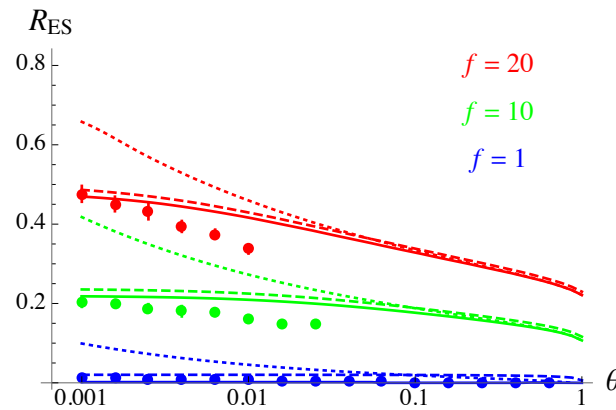

**Figure 6.** Evolutionarily stable chromosome map length  $R_{ES}$  (in Morgans) as a function of the cost of recombination  $\theta$  (on a log scale), for different numbers of segregating TE families  $f$ . Solid curves correspond to analytical predictions, obtained by solving  $s_{dir} + s_{ind,det} + s_{ind,HR} = 0$  for  $R$ , where  $s_{dir}$  is given by equation 19,  $s_{ind,det}$  by equation 20 and  $s_{ind,HR}$  by equation A113 in the Supplementary Methods. Dashed curves correspond to analytical predictions obtained when  $s_{ind,HR}$  is approximated by equation 21, and dotted curves to the predictions obtained when ignoring the deterministic component of indirect selection (obtained by solving  $s_{dir} + s_{ind,HR} = 0$  for  $R$ ). Dots: simulation results. On the right of the right-most points, TEs are accumulating (no stable equilibrium) and the simulation has to be stopped. Parameter values:  $N = 10^5$ ,  $u = 0.01$ ,  $v = 10^{-4}$ ,  $\alpha = 0$ ,  $\bar{n} = 10$  per family — in the simulations, the value of  $\tilde{\beta}$  (defined in equation 10) is set so that  $\bar{n} = 10$  (using equation 11 for  $\bar{n}$ ) when  $R$  is at its predicted evolutionarily stable value.
